# Supplementary material
Source: Research Square preprint supplement (doi:10.21203/rs.3.rs-9968515/v1)
Supplement: Supplementary file 1 [file b0d09c1974dca82e7158a2f7.docx]

**Fig. S-1. Evolution of PTcCO₂ with and without NIV.**

* indicates a p < 0.05 based on a Wilcoxon test comparing baseline and under-NIV values for the entire cohort.
NIV: non-invasive ventilation.

EELI: end-expiratory lung impedance; Te: expiratory time; RR: respiratory rate.
